# Supplementary material for: Association of congenital heart disease and neurodevelopmental disorders: an observational and Mendelian randomization study
Source: Springer Nature journal article supplement (doi:10.1186/s13052-024-01610-3), 2024-04-08

## Supplementary Materials

**Supplementary Table 1.** Information of single nucleotide polymorphisms used as instrumental variables.

**Supplementary Table 2.** Information of GWAS summary data used in the present study.

**Supplementary Table 3.** Multivariable logistic regression analyses of potential risk factors for neurodevelopmental disorders.

**Supplementary Table 4.** Baseline characteristics of children according to the presence of neurodevelopmental disorders after propensity score matching.

**Supplementary Table 5.** Association between genetically predicted congenital heart disease and neurodevelopmental disorders using inverse-variance weighted, Weighted median and MR-Egger methods.

**Supplementary Table 6.** Heterogeneity and sensitivity analyses in Mendelian randomization study using Cochran Q test, MR-Egger and MR-PRESSO methods.

**Supplementary Figure 1.** The scatter plot and results of leave-one-out analysis for autism spectrum disorder.

**Supplementary Figure 2.** The scatter plot and results of leave-one-out analysis for attention-deficit/hyperactivity disorder.

**Supplementary Figure 3.** The scatter plot and results of leave-one-out analysis for intellectual disability.

**Supplementary Figure 4.** The scatter plot and results of leave-one-out analysis for speech or language disorder.

**Supplementary Table 1. Information of single nucleotide polymorphisms used as instrumental variables.**

| SNP         | Chr | Base pair | Effect allele | Other allele | Effect allele frequency | Beta      | SE        | p value  | F-statistic |
|-------------|-----|-----------|---------------|--------------|-------------------------|-----------|-----------|----------|-------------|
| rs7543039   | 1   | 99584092  | T             | C            | 0.481595                | 0.120299  | 0.0242475 | 7.00E-07 | 24.6144     |
| rs186619278 | 1   | 184131190 | G             | A            | 0.0362712               | 0.273096  | 0.0592599 | 4.06E-06 | 21.2378     |
| rs72809964  | 2   | 73273924  | A             | G            | 0.021546                | 0.358721  | 0.0764614 | 2.71E-06 | 22.0105     |
| rs34485446  | 2   | 84845558  | A             | G            | 0.211535                | 0.142587  | 0.0291128 | 9.70E-07 | 23.9879     |
| rs729327    | 3   | 11132638  | A             | G            | 0.0705466               | 0.235755  | 0.0444073 | 1.10E-07 | 28.1847     |
| rs1319007   | 4   | 4665619   | C             | G            | 0.24914                 | 0.150933  | 0.0273075 | 3.25E-08 | 30.5495     |
| rs192987035 | 6   | 7558933   | T             | A            | 0.0105896               | 0.516519  | 0.101434  | 3.54E-07 | 25.9302     |
| rs12663370  | 6   | 33639596  | G             | T            | 0.150188                | -0.161116 | 0.0351552 | 4.58E-06 | 21.0038     |
| rs139210991 | 7   | 25032010  | C             | T            | 0.0136711               | -0.60829  | 0.128893  | 2.37E-06 | 22.2722     |
| rs3087368   | 7   | 44114893  | T             | C            | 0.0257437               | 0.325994  | 0.0703122 | 3.55E-06 | 21.4960     |
| rs61506866  | 10  | 5080610   | T             | G            | 0.208532                | 0.141746  | 0.0292018 | 1.21E-06 | 23.5615     |
| rs17686420  | 16  | 20142191  | T             | C            | 0.00215158              | 0.952859  | 0.20387   | 2.96E-06 | 21.8449     |
| rs6504672   | 17  | 47019579  | A             | T            | 0.17497                 | 0.195794  | 0.0305003 | 1.37E-10 | 41.2089     |
| rs2958659   | 22  | 40004908  | G             | A            | 0.291974                | -0.133992 | 0.0270429 | 7.24E-07 | 24.5500     |

Abbreviations: SNP, single nucleotide polymorphism; Chr, chromosome; SE, standard error.

**Supplementary Table 2. Information of GWAS summary data used in the present study.**

| Traits                                               | Dataset source                                       | Sample size                                         | Population ancestry | PMID     | Authors               | Data download                                                                                                                                                                                                                     |
|------------------------------------------------------|------------------------------------------------------|-----------------------------------------------------|---------------------|----------|-----------------------|-----------------------------------------------------------------------------------------------------------------------------------------------------------------------------------------------------------------------------------|
| Congenital malformations of heart and great arteries | FinnGen                                              | Number of cases:3,459<br>Number of controls:33,9040 | European            | NA       | NA                    | <a href="https://storage.googleapis.com/finngen-public-data-r8/summary_stats/finngen_R8_CONGEN_HEART_ARTER.gz">https://storage.googleapis.com/finngen-public-data-r8/summary_stats/finngen_R8_CONGEN_HEART_ARTER.gz</a>           |
| Autism Spectrum Disorder                             | iPSYCH(Integrative Psychiatric Research)-PGC         | Number of cases:18,382<br>Number of controls:27,969 | European            | 30804558 | Grove, Jakob et al    | <a href="https://gwas.mrcieu.ac.uk/datasets/ieu-a-1185/">https://gwas.mrcieu.ac.uk/datasets/ieu-a-1185/</a>                                                                                                                       |
| Attention deficit/hyperactivity disorder             | Psychiatric Genomics Consortium (PGC)                | Number of cases:20,183<br>Number of controls:35,191 | European            | 30478444 | Demontis, Ditte et al | <a href="https://gwas.mrcieu.ac.uk/datasets/ieu-a-1183/">https://gwas.mrcieu.ac.uk/datasets/ieu-a-1183/</a>                                                                                                                       |
| Childhood intelligence                               | Social Science Genetic Association Consortium(SSGAC) | Number of Sample sizes: 12,441                      | European            | 23358156 | Benyamin, B et al     | <a href="https://gwas.mrcieu.ac.uk/datasets/ieu-a-16/">https://gwas.mrcieu.ac.uk/datasets/ieu-a-16/</a>                                                                                                                           |
| Speech and linguistic disorders                      | FinnGen                                              | Number of cases:2,288<br>Number of controls:25,4976 | European            | NA       | NA                    | <a href="https://storage.googleapis.com/finngen-public-data-r8/summary_stats/finngen_R8_KRA_PSY_SPEELING_EXMORE.gz">https://storage.googleapis.com/finngen-public-data-r8/summary_stats/finngen_R8_KRA_PSY_SPEELING_EXMORE.gz</a> |

Abbreviations: GWAS, genome-wide association study; NA, not applicable.

**Supplementary Table 3. Multivariable logistic regression analyses of potential risk factors for neurodevelopmental disorders.**

| Variable                                      | Autism spectrum disorder          |         | Attention Deficit/Hyperactivity Disorder |         | Intellectual Disability           |         | Speech or language disorder       |         |
|-----------------------------------------------|-----------------------------------|---------|------------------------------------------|---------|-----------------------------------|---------|-----------------------------------|---------|
|                                               | Multivariate Adjusted OR (95% CI) | P value | Multivariate Adjusted OR (95% CI)        | P value | Multivariate Adjusted OR (95% CI) | P value | Multivariate Adjusted OR (95% CI) | P value |
| Age(years), (median [IQR])                    | 1.05(1.05-1.05)                   | <0.001  | 1.18(1.18-1.18)                          | <0.001  | 1.11(1.09-1.13)                   | <0.001  | 1(1-1)                            | 0.02    |
| Maternal age(median [IQR])                    | 1(1-1)                            | 0.63    | 0.96(0.96-0.96)                          | <0.001  | 0.97(0.95-0.99)                   | <0.001  | NA                                | NA      |
| Birth Weight(Ounces),(median [IQR])           | 1(1-1)                            | 0.05    | 1(1-1)                                   | <0.001  | 0.99(0.99-0.99)                   | <0.001  | NA                                | NA      |
| Race, n (%)                                   |                                   |         |                                          |         |                                   |         |                                   |         |
| Hispanic                                      | Reference                         |         | Reference                                |         | Reference                         |         | Reference                         |         |
| White, non-Hispanic                           | NA                                | NA      | 0.95(0.85-1.05)                          | 0.26    | NA                                | NA      | NA                                | NA      |
| Black, non-Hispanic                           | NA                                | NA      | 0.57(0.3-0.84)                           | <0.001  | NA                                | NA      | NA                                | NA      |
| Asian, non-Hispanic                           | NA                                | NA      | 0.28(0.1-0.46)                           | <0.001  | NA                                | NA      | NA                                | NA      |
| American Indian or Alaska Native Non-Hispanic | NA                                | NA      | 0.53(0.18-0.88)                          | <0.001  | NA                                | NA      | NA                                | NA      |
| Multi-Race Non-Hispanic                       | NA                                | NA      | 1.02(0.94-1.1)                           | 0.6     | NA                                | NA      | NA                                | NA      |
| Gender, n (%)                                 |                                   |         |                                          |         |                                   |         |                                   |         |
| Male                                          | Reference                         |         | Reference                                |         | Reference                         |         | Reference                         |         |
| Female                                        | 2.67(2.57-2.77)                   | <0.001  | 1.94(1.88-2)                             | <0.001  | 0.95(0.77-1.13)                   | 0.58    | 1.72(1.66-1.78)                   | <0.001  |
| Concussion or Brain Injury, n (%)             |                                   |         |                                          |         |                                   |         |                                   |         |
| No                                            | Reference                         |         | Reference                                |         | Reference                         |         | Reference                         |         |
| Yes                                           | 0.64(0.46-0.82)                   | <0.001  | 1.27(1.19-1.35)                          | <0.001  | 1.3(1.05-1.55)                    | 0.05    | 1.19(1.09-1.29)                   | <0.001  |
| Preterm birth, n (%)                          |                                   |         |                                          |         |                                   |         |                                   |         |
| No                                            | Reference                         |         | Reference                                |         | Reference                         |         | Reference                         |         |
| Yes                                           | 1.22(1.08-1.36)                   | 0.01    | 1.31(1.23-1.39)                          | <0.001  | 1.07(0.83-1.31)                   | 0.57    | 1.49(1.41-1.57)                   | <0.001  |
| Cerebral Palsy, n (%)                         |                                   |         |                                          |         |                                   |         |                                   |         |
| No                                            | Reference                         |         | Reference                                |         | Reference                         |         | Reference                         |         |
| Yes                                           | 0.68(0.25-1.11)                   | 0.08    | 0.53(0.14-0.92)                          | <0.001  | 17.21(16.84-17.58)                | <0.001  | 6.66(6.35-6.97)                   | <0.001  |
| Down Syndrome, n (%)                          |                                   |         |                                          |         |                                   |         |                                   |         |
| No                                            | Reference                         |         | Reference                                |         | Reference                         |         | Reference                         |         |
| Yes                                           | 0.29(-0.24-0.82)                  | <0.001  | NA                                       | NA      | 149.79(149.34-150.24)             | <0.001  | 8.73(8.3-9.16)                    | <0.001  |
| Other genetic or inherited condition, n (%)   |                                   |         |                                          |         |                                   |         |                                   |         |
| No                                            | Reference                         |         | Reference                                |         | Reference                         |         | Reference                         |         |
| Yes                                           | 3.27(3.15-3.39)                   | <0.001  | 3.03(2.95-3.11)                          | <0.001  | 3.73(3.55-3.91)                   | <0.001  | 2.57(2.47-2.67)                   | <0.001  |
| Intellectual Disability                       |                                   |         |                                          |         |                                   |         |                                   |         |
| No                                            | Reference                         |         | Reference                                |         | Reference                         |         | Reference                         |         |
| Yes                                           | 5.23(5.03-5.43)                   | <0.001  | 1.17(0.99-1.35)                          | 0.08    | NA                                | NA      | 10.96(10.76-11.16)                | <0.001  |
| Speech or language disorder, n                |                                   |         |                                          |         |                                   |         |                                   |         |

|                                                       |                 |        |                  |        |                    |        |                 |        |
|-------------------------------------------------------|-----------------|--------|------------------|--------|--------------------|--------|-----------------|--------|
| (%)                                                   |                 |        |                  |        |                    |        |                 |        |
| No                                                    | Reference       |        | Reference        |        | Reference          |        | Reference       |        |
| Yes                                                   | 9.44(9.34-9.54) | <0.001 | 2.19(2.11-2.27)  | <0.001 | 15.26(15.06-15.46) | <0.001 | NA              | NA     |
| Autism spectrum disorder(ASD), n (%)                  |                 |        |                  |        |                    |        |                 |        |
| No                                                    | Reference       |        | Reference        |        | Reference          |        | Reference       |        |
| Yes                                                   | NA              | NA     | 3.91(3.81-4.01)  | <0.001 | 6.18(6-6.36)       | <0.001 | 8.35(8.25-8.45) | <0.001 |
| Attention Deficit/Hyperactivity Disorder(ADHD), n (%) |                 |        |                  |        |                    |        |                 |        |
| No                                                    | Reference       |        | Reference        |        | Reference          |        | Reference       |        |
| Yes                                                   | 4.05(3.95-4.15) | <0.001 | NA               | NA     | 1.81(1.63-1.99)    | <0.001 | 1.75(1.67-1.83) | <0.001 |
| Congenital Heart Condition, n (%)                     |                 |        |                  |        |                    |        |                 |        |
| No                                                    | Reference       |        | Reference        |        | Reference          |        | Reference       |        |
| Yes                                                   | 0.95(0.26-1.64) | 0.88   | 1.01(0.62-1.4)   | 0.96   | 1.62(0.56-2.68)    | 0.37   | 1.61(1.14-2.08) | 0.04   |
| Heart Condition Currently, n (%)                      |                 |        |                  |        |                    |        |                 |        |
| Does not have condition Ever, but not currently       | Reference       |        | Reference        |        | Reference          |        | Reference       |        |
| Currently has condition                               | 0.81(-0.5-2.12) | 0.76   | 0.64(-0.36-1.64) | 0.38   | 0.98(-0.69-2.65)   | 0.99   | 2.45(1.65-3.25) | 0.03   |
| Severity of Current Heart Condition, n (%)            |                 |        |                  |        |                    |        |                 |        |
| Does not currently have condition                     | Reference       |        | Reference        |        | Reference          |        | Reference       |        |
| Mild                                                  | 1.38(0.2-2.56)  | 0.59   | 1.92(0.98-2.86)  | 0.17   | 1.02(-0.33-2.37)   | 0.98   | 0.4(-0.27-1.07) | 0.01   |
| Moderate                                              | 1.41(0.14-2.68) | 0.6    | 2.4(1.4-3.4)     | 0.08   | 1.71(0.24-3.18)    | 0.47   | 0.4(-0.36-1.16) | 0.02   |
| Severe                                                | NA              | NA     | NA               | NA     | NA                 | NA     | NA              | NA     |

Abbreviations: IQR, interquartile range; OR, odds ratio; CI, confidence interval; NA, not applicable.

**Supplementary Table 4. Baseline characteristics of children according to the presence of neurodevelopmental disorders after propensity score matching.**

| Characteristics                               | Autism spectrum disorder |                         |       | Attention Deficit/Hyperactivity Disorder |                         |         | Intellectual Disability |                        |       | Speech or language disorder |                         |        |
|-----------------------------------------------|--------------------------|-------------------------|-------|------------------------------------------|-------------------------|---------|-------------------------|------------------------|-------|-----------------------------|-------------------------|--------|
|                                               | No                       | Yes                     | p     | No                                       | Yes                     | p value | No                      | Yes                    | p     | No                          | Yes                     | p      |
|                                               | (N = 2510)               | (N = 2510)              | value | (N = 8063)                               | (N = 8063)              |         | (N = 780)               | (N = 780)              | value | (N = 6492)                  | (N = 6492)              | value  |
| Age(years), (median (IQR))                    | 11.00 (7.00, 15.00)      | 11.00 (6.00, 15.00)     | 0.045 | 14.00 (10.00, 16.00)                     | 13.00 (10.00, 15.00)    | <0.001  | 11.50 (8.00, 15.00)     | 12.00 (8.00, 15.00)    | 0.957 | 9.00 (5.00, 13.00)          | 8.00 (5.00, 12.00)      | 0.005  |
| Maternal age(median (IQR))                    | 30.00 (25.00, 34.00)     | 30.00 (25.00, 34.00)    | 0.489 | 29.00 (25.00, 33.00)                     | 29.00 (24.00, 34.00)    | 0.897   | 29.00 (24.00, 34.00)    | 29.00 (24.00, 34.00)   | 0.508 | 30.00 (26.00, 34.00)        | 30.00 (26.00, 34.00)    | 0.836  |
| Birth Weight(Ounces),(median (IQR))           | 119.00 (103.00, 131.00)  | 118.00 (103.25, 130.00) | 0.513 | 118.00 (104.00, 129.00)                  | 118.00 (103.00, 129.00) | 0.313   | 110.00 (89.00, 123.00)  | 112.00 (91.00, 127.00) | 0.04  | 118.00 (104.00, 130.00)     | 118.00 (103.00, 130.00) | 0.497  |
| Race, n (%)                                   |                          |                         | 0.685 |                                          |                         | 0.324   |                         |                        | 0.766 |                             |                         | <0.001 |
| Hispanic                                      | 1964 (78.2)              | 1929 (76.9)             |       | 6597 (81.8)                              | 6505 (80.7)             |         | 581 (74.5)              | 573 (73.5)             |       | 5270 (81.2)                 | 5087 (78.4)             |        |
| White, non-Hispanic                           | 194 (7.7)                | 186 (7.4)               |       | 604 (7.5)                                | 605 (7.5)               |         | 82 (10.5)               | 74 (9.5)               |       | 440 (6.8)                   | 469 (7.2)               |        |
| Black, non-Hispanic                           | 15 (0.6)                 | 18 (0.7)                |       | 61 (0.8)                                 | 61 (0.8)                |         | 10 (1.3)                | 10 (1.3)               |       | 65 (1.0)                    | 74 (1.1)                |        |
| Asian, non-Hispanic                           | 93 (3.7)                 | 106 (4.2)               |       | 116 (1.4)                                | 137 (1.7)               |         | 25 (3.2)                | 35 (4.5)               |       | 166 (2.6)                   | 234 (3.6)               |        |
| American Indian or Alaska Native Non-Hispanic | 13 (0.5)                 | 16 (0.6)                |       | 35 (0.4)                                 | 37 (0.5)                |         | 5 (0.6)                 | 7 (0.9)                |       | 24 (0.4)                    | 39 (0.6)                |        |
| Multi-Race Non-Hispanic                       | 231 (9.2)                | 255 (10.2)              |       | 650 (8.1)                                | 718 (8.9)               |         | 77 (9.9)                | 81 (10.4)              |       | 527 (8.1)                   | 589 (9.1)               |        |
| Gender, n (%)                                 |                          |                         | 0.39  |                                          |                         | 1       |                         |                        | 0.79  |                             |                         | <0.001 |
| Male                                          | 525 (20.9)               | 551 (22)                |       | 2628 (32.6)                              | 2627 (32.6)             |         | 267 (34.2)              | 273 (35.0)             |       | 1977 (30.5)                 | 2171 (33.4)             |        |
| Female                                        | 1985 (79.1)              | 1959 (78.0)             |       | 5435 (67.4)                              | 5436 (67.4)             |         | 513 (65.8)              | 507 (65.0)             |       | 4515 (69.5)                 | 4321 (66.6)             |        |
| Concussion or Brain Injury, n (%)             |                          |                         | 1     |                                          |                         | 0.424   |                         |                        | 0.76  |                             |                         | 0.483  |
| No                                            | 2332 (92.9)              | 2331 (92.9)             |       | 7238 (89.8)                              | 7206 (89.4)             |         | 680 (87.2)              | 685 (87.8)             |       | 5997 (92.4)                 | 6019 (92.7)             |        |
| Yes                                           | 178 (7.1)                | 179 (7.1)               |       | 825 (10.2)                               | 857 (10.6)              |         | 100 (12.8)              | 95 (12.2)              |       | 495 (7.6)                   | 473 (7.3)               |        |
| Preterm birth, n (%)                          |                          |                         | 0.348 |                                          |                         | 0.023   |                         |                        | 0.081 |                             |                         | 0.454  |
| No                                            | 2069 (82.4)              | 2095 (83.5)             |       | 6935 (86.0)                              | 6832 (84.7)             |         | 567 (72.7)              | 598 (76.7)             |       | 5376 (82.8)                 | 5409 (83.3)             |        |
| Yes                                           | 441 (17.6)               | 415 (16.5)              |       | 1128 (14.0)                              | 1231 (15.3)             |         | 213 (27.3)              | 182 (23.3)             |       | 1116 (17.2)                 | 1083 (16.7)             |        |
| Cerebral Palsy, n (%)                         |                          |                         | 0.904 |                                          |                         | 0.826   |                         |                        | 0.701 |                             |                         | 0.733  |
| No                                            | 2474 (98.6)              | 2476 (98.6)             |       | 8020 (99.5)                              | 8023 (99.5)             |         | 724 (92.8)              | 719 (92.2)             |       | 6425 (99.0)                 | 6420 (98.9)             |        |
| Yes                                           | 36 (1.4)                 | 34 (1.4)                |       | 43 (0.5)                                 | 40 (0.5)                |         | 56 (7.2)                | 61 (7.8)               |       | 67 (1.0)                    | 72 (1.1)                |        |
| Down Syndrome, n (%)                          |                          |                         | 0.494 |                                          |                         | 0.888   |                         |                        | 0.144 |                             |                         | 0.487  |
| No                                            | 2480 (98.8)              | 2486 (99)               |       | 8037 (99.7)                              | 8039 (99.7)             |         | 745 (95.5)              | 731 (93.7)             |       | 6458 (99.5)                 | 6451 (99.4)             |        |
| Yes                                           | 30 (1.2)                 | 24 (1.0)                |       | 26 (0.3)                                 | 24 (0.3)                |         | 35 (4.5)                | 49 (6.3)               |       | 34 (0.5)                    | 41 (0.6)                |        |
| Other genetic or inherited condition, n (%)   |                          |                         | 0.066 |                                          |                         | <0.001  |                         |                        | 0.462 |                             |                         | 0.651  |
| No                                            | 1953 (77.8)              | 1897 (75.6)             |       | 7139 (88.5)                              | 6991 (86.7)             |         | 503 (64.5)              | 488 (62.6)             |       | 5676 (87.4)                 | 5694 (87.7)             |        |
| Yes                                           | 557 (22.2)               | 613 (24.4)              |       | 924 (11.5)                               | 1072 (13.3)             |         | 277 (35.5)              | 292 (37.4)             |       | 816 (12.6)                  | 798 (12.3)              |        |
| Autism spectrum disorder(ASD), n (%)          |                          |                         | NA    |                                          |                         | <0.001  |                         |                        | 0.31  |                             |                         | 0.98   |

|                                                       |             |              |             |              |              |             |             |              |              |
|-------------------------------------------------------|-------------|--------------|-------------|--------------|--------------|-------------|-------------|--------------|--------------|
| No                                                    | NA          | NA           | 7218 (89.5) | 7032 (87.2)  | 402 (51.5)   | 423 (54.2)  | 5528 (85.2) | 5530 (85.2)  |              |
| Yes                                                   | NA          | NA           | 845 (10.5)  | 1031 ( 12.8) | 378 (48.5)   | 357 ( 45.8) | 964 (14.8)  | 962 ( 14.8)  |              |
| Attention Deficit/Hyperactivity Disorder(ADHD), n (%) |             |              | 0.41        |              | NA           |             | 0.168       |              | 0.012        |
| No                                                    | 1388 (55.3) | 1418 (56.5)  | NA          | NA           | 428 (54.9)   | 456 (58.5)  | 4957 (76.4) | 5078 (78.2)  |              |
| Yes                                                   | 1122 (44.7) | 1092 ( 43.5) | NA          | NA           | 352 (45.1)   | 324 ( 41.5) | 1535 (23.6) | 1414 ( 21.8) |              |
| Intellectual Disability                               |             |              | <0.001      |              | 0.026        |             | NA          |              | 0.001        |
| No                                                    | 2262 (90.1) | 2182 (86.9)  |             | 7805 (96.8)  | 7752 (96.1)  | NA          | NA          | 6319 (97.3)  | 6252 (96.3)  |
| Yes                                                   | 248 ( 9.9)  | 328 ( 13.1)  |             | 258 ( 3.2)   | 311 ( 3.9)   | NA          | NA          | 173 ( 2.7)   | 240 ( 3.7)   |
| Speech or language disorder, n (%)                    |             |              | 0.182       |              | 0.078        |             | 0.673       |              | NA           |
| No                                                    | 1107 (44.1) | 1155 (46.0)  |             | 6571 (81.5)  | 6482 (80.4)  | 175 (22.4)  | 183 (23.5)  | NA           | NA           |
| Yes                                                   | 1403 (55.9) | 1355 ( 54.0) |             | 1492 (18.5)  | 1581 ( 19.6) | 605 (77.6)  | 597 ( 76.5) | NA           | NA           |
| Congenital Heart Condition, n (%)                     |             |              | 0.444       |              | 0.003        |             | 0.012       |              | <0.001       |
| No                                                    | 2374 (94.6) | 2387 (95.1)  |             | 7826 (97.1)  | 7757 (96.2)  | 717 (91.9)  | 686 (87.9)  | 6296 (97.0)  | 6177 (95.1)  |
| Yes                                                   | 136 ( 5.4)  | 123 ( 4.9)   |             | 237 ( 2.9)   | 306 ( 3.8)   | 63 ( 8.1)   | 94 ( 12.1)  | 196 ( 3.0)   | 315 ( 4.9)   |
| Heart Condition Currently, n (%)                      |             |              | 0.698       |              | 0.002        |             | 0.033       |              | <0.001       |
| Does not have condition Ever, but not currently       | 2365 (94.2) | 2375 ( 94.6) |             | 7803 (96.8)  | 7718 ( 95.7) | 711 (91.2)  | 680 ( 87.2) | 6273 (96.6)  | 6153 ( 94.8) |
| Currently has condition                               | 82 ( 3.3)   | 81 ( 3.2)    |             | 152 ( 1.9)   | 196 ( 2.4)   | 42 ( 5.4)   | 66 ( 8.5)   | 126 ( 1.9)   | 188 ( 2.9)   |
| Severity of Current Heart Condition, n (%)            | 63 ( 2.5)   | 54 ( 2.2)    |             | 108 ( 1.3)   | 149 ( 1.8)   | 27 ( 3.5)   | 34 ( 4.4)   | 93 ( 1.4)    | 151 ( 2.3)   |
| Does not currently have condition                     |             |              | <0.001      |              | <0.001       |             | 0.033       |              | 0.001        |
| Mild                                                  | 2428 (96.7) | 2429 ( 96.8) |             | 7911 (98.1)  | 7867 ( 97.6) | 738 (94.6)  | 714 ( 91.5) | 6366 (98.1)  | 6304 ( 97.1) |
| Moderate                                              | 59 ( 2.4)   | 58 ( 2.3)    |             | 113 ( 1.4)   | 145 ( 1.8)   | 30 ( 3.8)   | 42 ( 5.4)   | 99 ( 1.5)    | 136 ( 2.1)   |
| Severe                                                | 18 ( 0.7)   | 19 ( 0.8)    |             | 26 ( 0.3)    | 44 ( 0.5)    | 7 ( 0.9)    | 20 ( 2.6)   | 23 ( 0.4)    | 36 ( 0.6)    |
|                                                       | 5 ( 0.2)    | 4 ( 0.2)     |             | 13 ( 0.2)    | 7 ( 0.1)     | 5 ( 0.6)    | 4 ( 0.5)    | 4 ( 0.1)     | 16 ( 0.2)    |

Abbreviations: IQR, interquartile range; NA, not applicable.

**Supplementary Table 5. Association between genetically predicted congenital heart disease and neurodevelopmental disorders using inverse-variance weighted, Weighted median and MR-Egger methods.**

| Outcome                                  | Number of SNPs | IVW               |         | Weighted median            |         | MR-Egger estimate |         |
|------------------------------------------|----------------|-------------------|---------|----------------------------|---------|-------------------|---------|
|                                          |                | OR(95%CI)         | p value | OR(95%CI)                  | p value | OR(95%CI)         | p value |
| Autism Spectrum Disorder                 | 10             | 1.04(0.97 - 1.12) | 0.2523  | 1.03(0.93 - 1.13)          | 0.5705  | 0.96(0.84 - 1.11) | 0.6172  |
| Attention deficit/hyperactivity disorder | 9              | 0.98(0.91 - 1.06) | 0.5891  | 1.02(0.9176523 - 1.126230) | 0.7526  | 0.86(0.70 - 1.04) | 0.1673  |
| Childhood intelligence                   | 4              | 0.92(0.83 - 1.03) | 0.1512  | 0.96(0.84 - 1.08)          | 0.4758  | 0.71(0.41 - 1.21) | 0.3303  |
| Speech and linguistic disorders          | 14             | 1.01(0.87 - 1.16) | 0.9396  | 1.03(0.85 - 1.25)          | 0.7424  | 0.73(0.51 - 1.03) | 0.0957  |

Abbreviations: SNP, single nucleotide polymorphism; OR, odds ratio; CI, confidence interval; IVW, inverse-variance-weighted (random-effects model); MR, Mendelian randomization.

**Supplementary Table 6. Heterogeneity and sensitivity analyses in Mendelian randomization study using Cochran Q test, MR-Egger and MR-PRESSO methods.**

| Outcome                                  | Number of SNPs | Cochran's Q statistic | p value for Cochran Q test | p value for MR-Egger intercept | p value for MR-PRESSO global test |
|------------------------------------------|----------------|-----------------------|----------------------------|--------------------------------|-----------------------------------|
| Autism Spectrum Disorder                 | 10             | 9.8916                | 0.3593                     | 0.2268                         | 0.367                             |
| Attention deficit/hyperactivity disorder | 9              | 6.2199                | 0.6226                     | 0.1920                         | 0.641                             |
| Childhood intelligence                   | 4              | 3.3118                | 0.3460                     | 0.4216                         | 0.409                             |
| Speech and linguistic disorders          | 14             | 8.1261                | 0.8353                     | 0.0662                         | 0.857                             |

Abbreviations: SNP, single nucleotide polymorphism; MR, Mendelian randomization; PRESSO, Pleiotropy Residual Sum and Outlier.



Supplementary Figure 1. The scatter plot and results of leave-one-out analysis for autism spectrum disorder.

A. The scatter plot

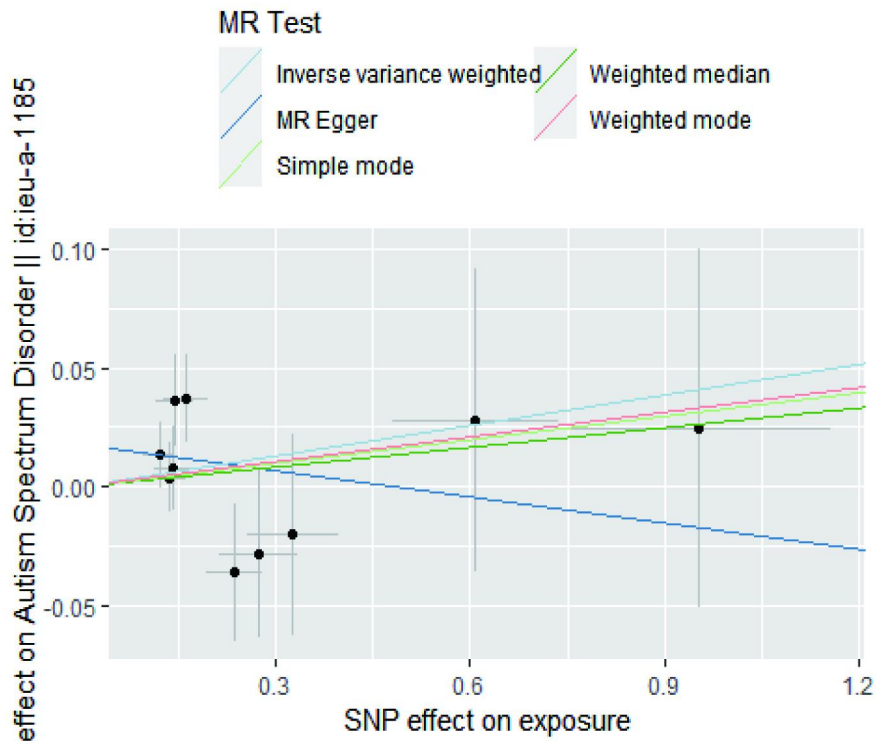

B. Result of leave-one-out analysis

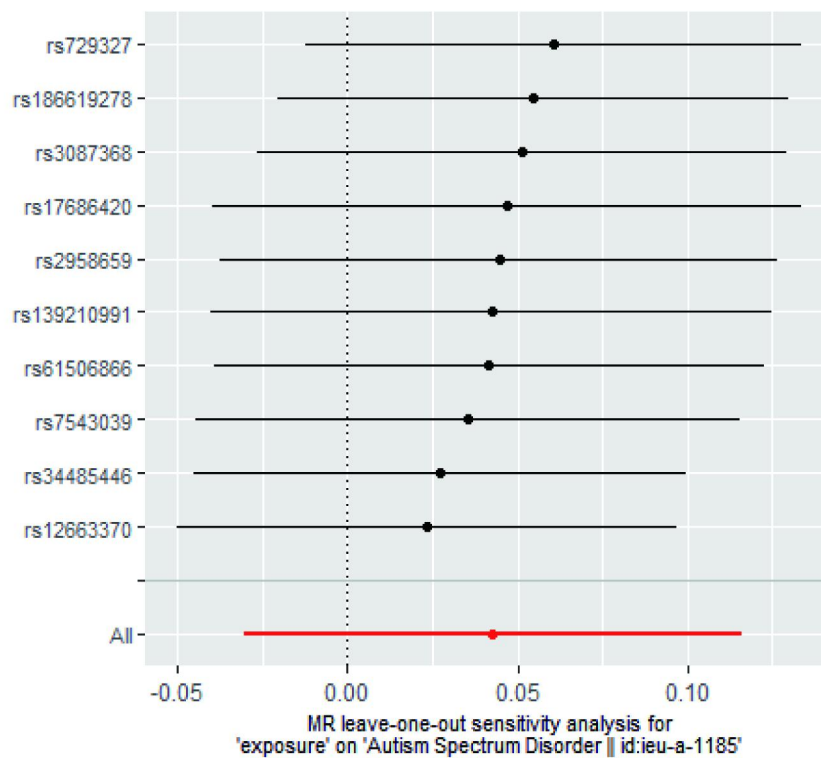

Supplementary Figure 2. The scatter plot and results of leave-one-out analysis for attention-deficit/hyperactivity disorder.

### A. The scatter plot

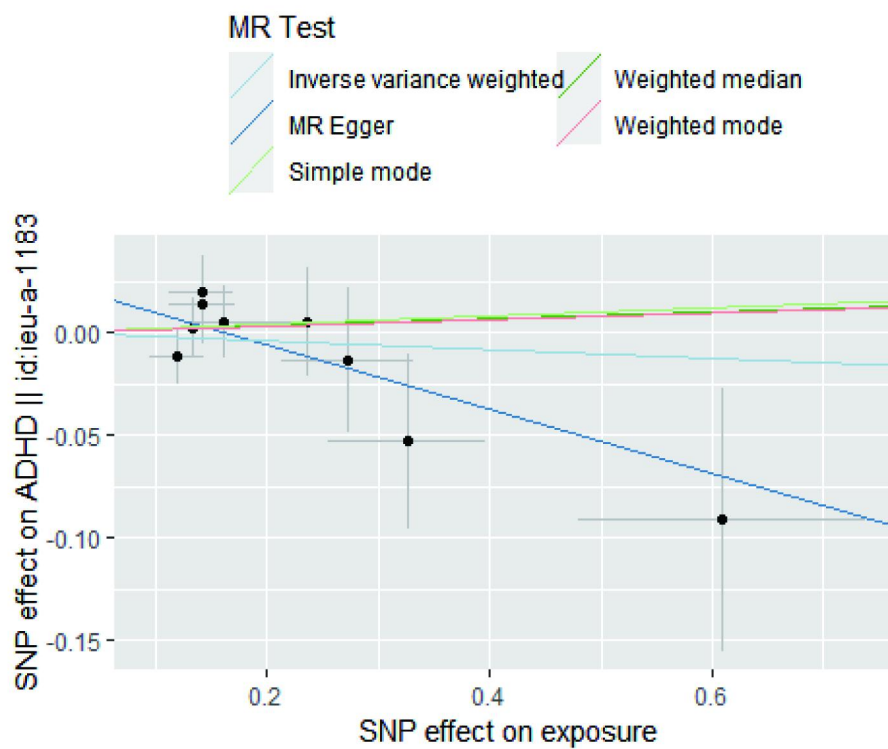

### B. Result of leave-one-out analysis

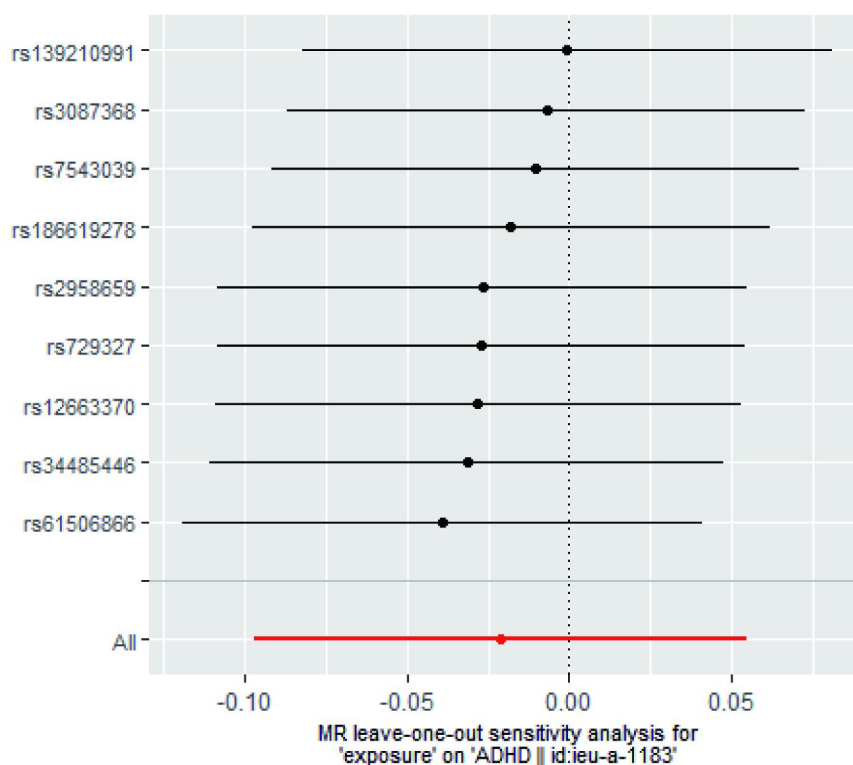

Supplementary Figure 3. The scatter plot and results of leave-one-out analysis for intellectual disability.

### A. The scatter plot

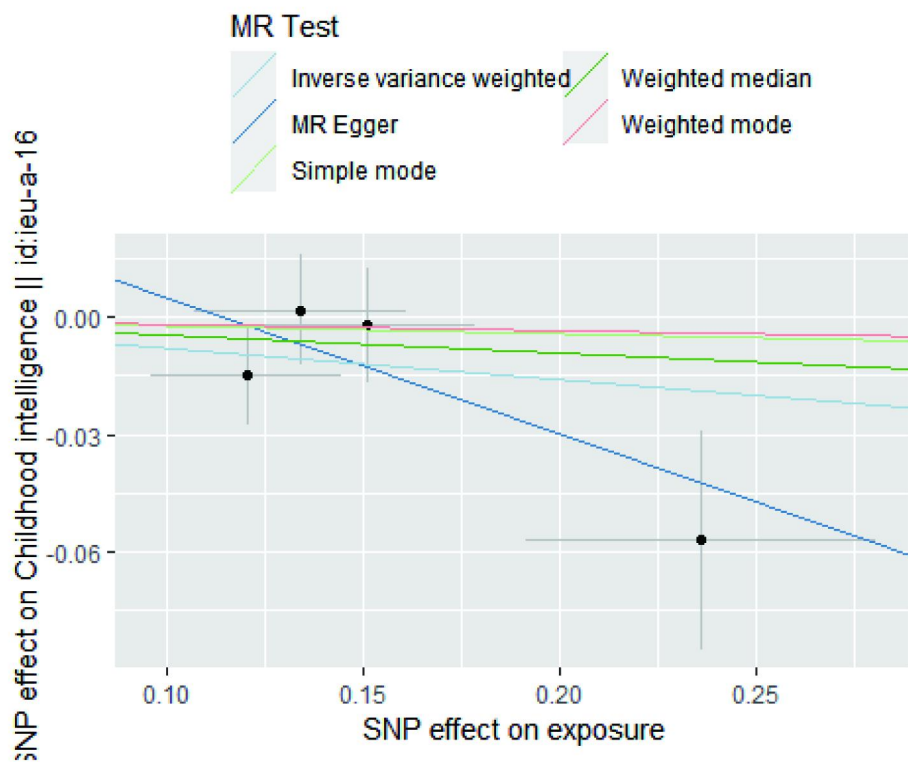

### B. Result of leave-one-out analysis

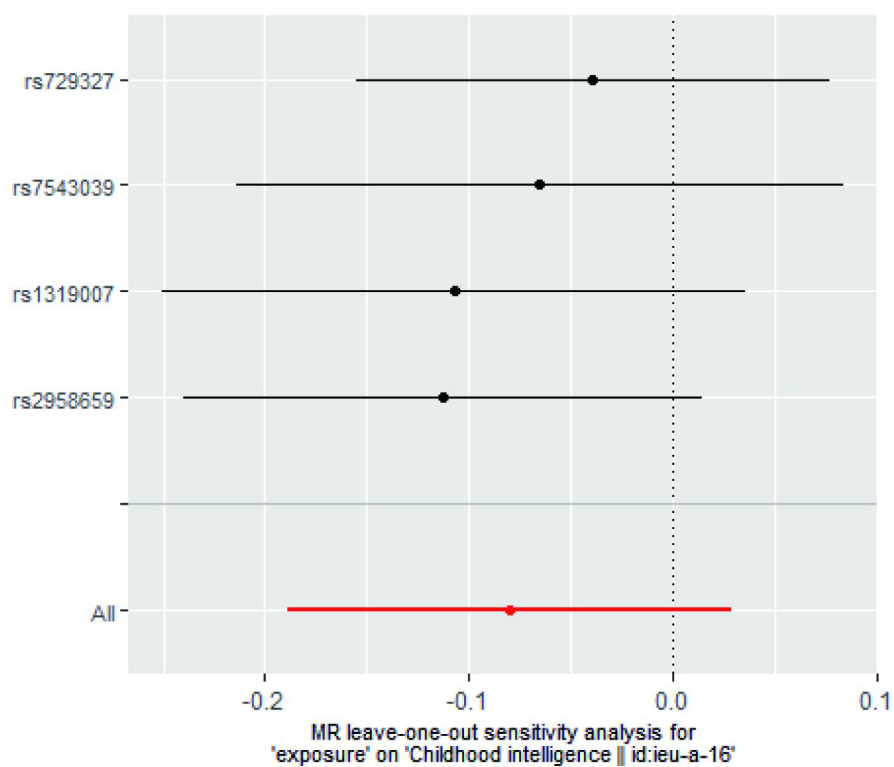

Supplementary Figure 4. The scatter plot and results of leave-one-out analysis for speech or language disorder.

### A. The scatter plot

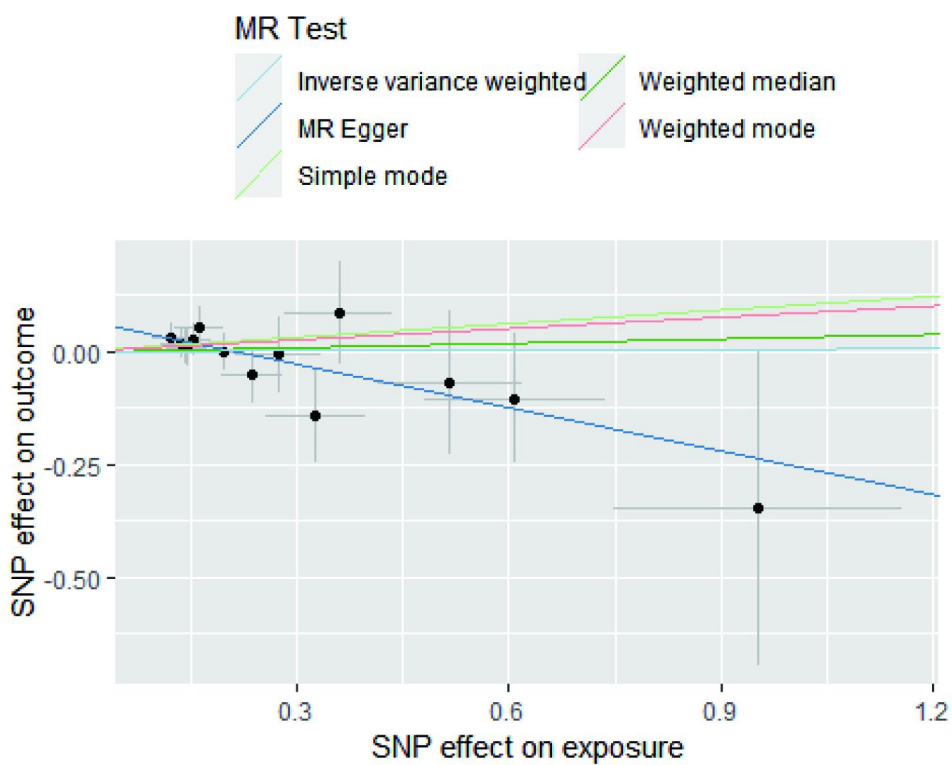

### B. Result of leave-one-out analysis

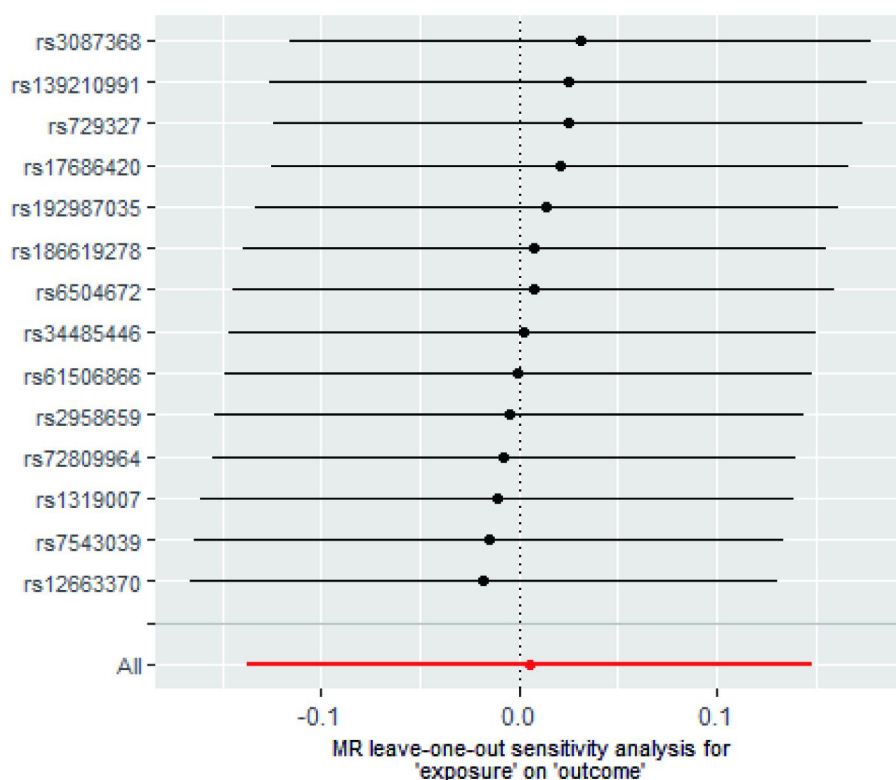

Supplement: MOESM1 [file 26956120]
